# Supplementary material for: Plasma alpha‐synuclein detected by single molecule array is increased in PD
Source: PubMed Central journal article supplement — Ann Clin Transl Neurol. 2019 Feb 15;6(3):615–9. doi: 10.1002/acn3.729 (PMC6414476; doi:10.1002/acn3.729), 2019-02-15
Supplement: ACN3-6-615-s002.pdf [file ACN3-6-615-s002.pdf]

**SUMMARY AND EXPLANATION OF THE TEST**

Alpha-Synuclein ( $\alpha$ -Synuclein) is a member of the synuclein family of proteins including  $\beta$ -synuclein and  $\gamma$ -synuclein.  $\alpha$ -Synuclein has been found concentrated in the presynaptic nerve terminals of neurons and in the nucleus of neurons. The human  $\alpha$ -synuclein protein is made of 140 amino acids, encoded by the SNCA gene. The physiological function of  $\alpha$ -synuclein may associate with regulating synaptic transmission, dopamine metabolism, vesicle trafficking etc. While native  $\alpha$ -synuclein is unfolded, it has a propensity to form toxic soluble oligomers (i.e., protofibrils) that ultimately aggregate into insoluble fibrils. The fibrils and amyloid forms of  $\alpha$ -synuclein are major components of Lewy bodies.  $\alpha$ -Synuclein has been linked to the pathogenesis of Parkinson's disease, Parkinson's disease dementia, and dementia with Lewy bodies.  $\alpha$ -Synuclein is also shown to be linked with Alzheimer's disease.

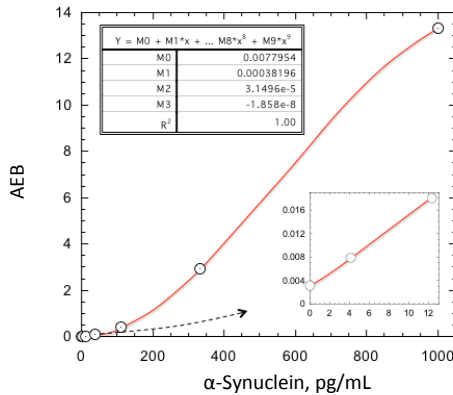

**Figure 1:** Simoa™  $\alpha$ -Synuclein immunoassay calibration curve. Cubic curve fit parameters are depicted.

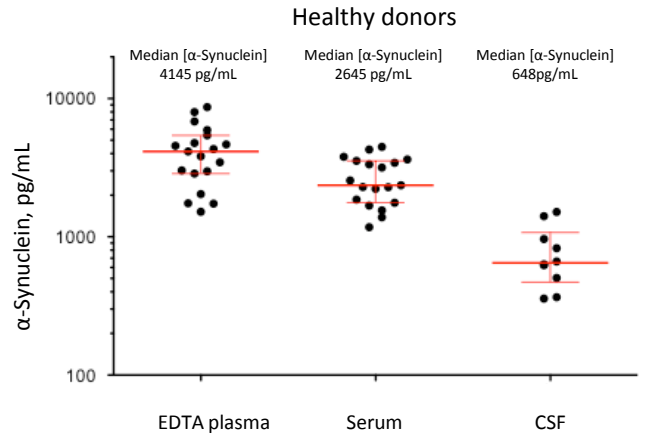

**Figure 2:** [ $\alpha$ -Synuclein] in EDTA plasma (n = 20), matched serum (n = 20), and cerebral spinal fluid (CSF, n = 10). Error bars depict median and interquartile ranges.

**Table 1: General characteristics of Simoa Human  $\alpha$ -Synuclein immunoassay**

|                                                                                                                                          |                |
|------------------------------------------------------------------------------------------------------------------------------------------|----------------|
| <b>Calibration range</b>                                                                                                                 | 0-1,000 pg/mL  |
| <b>Dynamic range<sup>1</sup></b>                                                                                                         | 0-10,000 pg/mL |
| <b>Lower limit of detection</b> (2.5SD; 3 reps x 5 runs, 1 instrument, 1 reagent lot; mean LoD <sup>2</sup> )                            | 0.955 pg/mL    |
| <b>Lower limit of quantification</b> (5 runs, 1 instrument, 1 reagent lot) <sup>3</sup>                                                  | 4.12 pg/mL     |
| <b>Spike-recovery (serum/plasma)</b> ( $\alpha$ -Synuclein spiked into 2 serum and 2 plasma samples at 2 levels, mean <sup>4</sup> )     | 86.0%          |
| <b>Spike-recovery (CSF)</b> ( $\alpha$ -Synuclein spiked into 4 CSF samples at 2 levels, mean <sup>5</sup> )                             | 105.7%         |
| <b>Dilution Linearity (serum)</b> (Spiked serum diluted 2x serially from MRD to 32xMRD with Sample Diluent, mean recovery <sup>6</sup> ) | 94.7%          |
| <b>Dilution Linearity (CSF)</b> (CSF sample diluted 2x serially from MRD to 64xMRD with Sample Diluent, mean recovery <sup>7</sup> )     | 88.0%          |
| <b>Typical sample volume</b> (Includes dead volume; see Package Insert for details)                                                      | 19 $\mu$ L     |
| <b>Minimum sample volume</b> (Includes dead volume; see Package Insert for details)                                                      | 2.1 $\mu$ L    |

The Simoa Human  $\alpha$ -Synuclein immunoassay quantifies  $\alpha$ -synuclein in serum, plasma and CSF with median  $\alpha$ -synuclein values well above the sensitivity limit.

<sup>1</sup>Samples auto-diluted 10X. <sup>2</sup>SD 0.691 pg/mL; range 0.202-1.760 pg/mL. <sup>3</sup> $\leq$ 20%CV, 80-120% recovery; pooled CV 14.0%, mean recovery 101.1%; not corrected for pre-dilutions; 10X LoQ 41.2 pg/mL. <sup>4</sup>Range 79.7-93.6%. <sup>5</sup>Range 102.4-108.4%. <sup>6</sup>Range 82.2-105.7%; minimum recommended dilution (MRD) 1:10. <sup>7</sup>Range 74.9-100.1%; MRD 1:10.

**Table 2: Precision characteristics of Simoa Human  $\alpha$ -Synuclein immunoassay.** Representative precision was estimated with repeated assay of serum panels using three instruments and one reagent lot. Within-run and between-run CVs are depicted in the following table. Within-run CVs reflect average CVs across 5 experiments of 3 replicates each.

| Sample        | Mean $\alpha$ -Synuclein (pg/mL) | Within Run %CV (n=5) | Between Run %CV (n=5) |
|---------------|----------------------------------|----------------------|-----------------------|
| Serum panel 1 | 1933.4                           | 3.1                  | 3.2                   |
| Serum panel 2 | 3325.0                           | 5.2                  | 2.2                   |
| Serum panel 3 | 563                              | 3.1                  | 2.3                   |

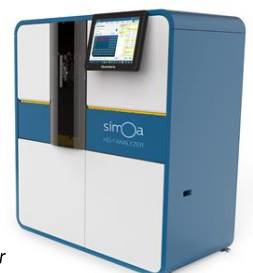

Simoa HD-1 Analyzer

Representative data. Individual results may vary depending upon samples tested and protocols followed.

For Research Use Only. Not for use in diagnostic procedures.
